# Supplementary material
Source: MDPI journal article supplement (https://www.mdpi.com/2076-3417/13/9/5676)
Supplement: s1 [file s1 › applsci-2339874-supplementary.pdf]

Table S1 Grouping of American ginseng and soil samples

| Sampling address   | Field | Planting<br>years | Soil sample<br>number | American ginseng<br>sample number |
|--------------------|-------|-------------------|-----------------------|-----------------------------------|
| Yaojia village     | 1     | 3                 | YS1                   | YG1                               |
| Yaojia village     | 2     | 3                 | YS2                   | YG2                               |
| Yaojia village     | 3     | 3                 | YS3                   | YG3                               |
| Beishadao village  | 1     | 3                 | BS1                   | BG1                               |
| Beishadao village  | 2     | 3                 | BS2                   | BG2                               |
| Beishadao village  | 3     | 3                 | BS3                   | BG3                               |
| Nanshadao village  | 1     | 3                 | NS1                   | NG1                               |
| Nanshadao village  | 2     | 3                 | NS2                   | NG2                               |
| Nanshadao village  | 3     | 3                 | NS3                   | NG3                               |
| Caiguantun village | 1     | 3                 | CS1                   | CG1                               |
| Caiguantun village | 2     | 3                 | CS2                   | CG2                               |
| Caiguantun village | 3     | 3                 | CS3                   | CG3                               |
| Caiguantun village | 1     | 1                 | ACS                   | ACG                               |
| Caiguantun village | 2     | 2                 | BCS                   | BCG                               |
| Caiguantun village | 3     | 3                 | TCS                   | TCG                               |
